# Supplementary material
Source: Springer Nature journal article supplement (https://www.springermedizin.de/resource/supplementary/12955_2009_650_MOESM7_ESM.pdf/9560998)

### (a) Role emotional

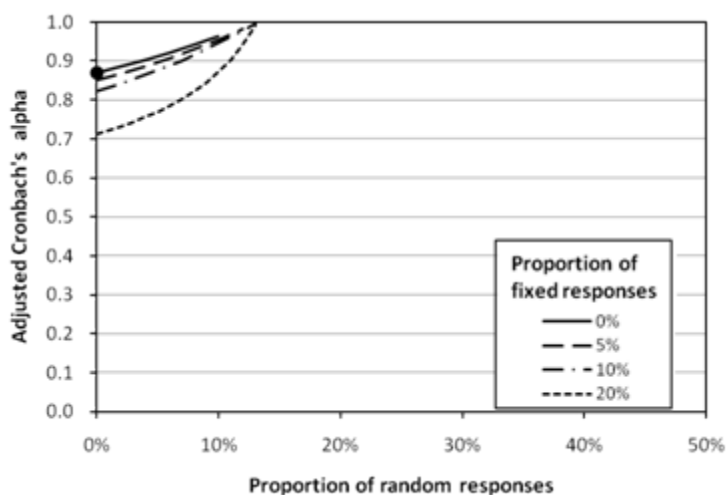

### (b) Physical functioning

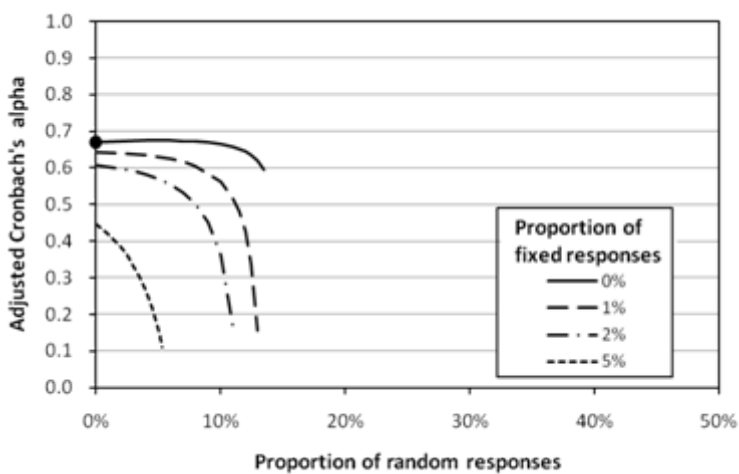

### (c) Mental health

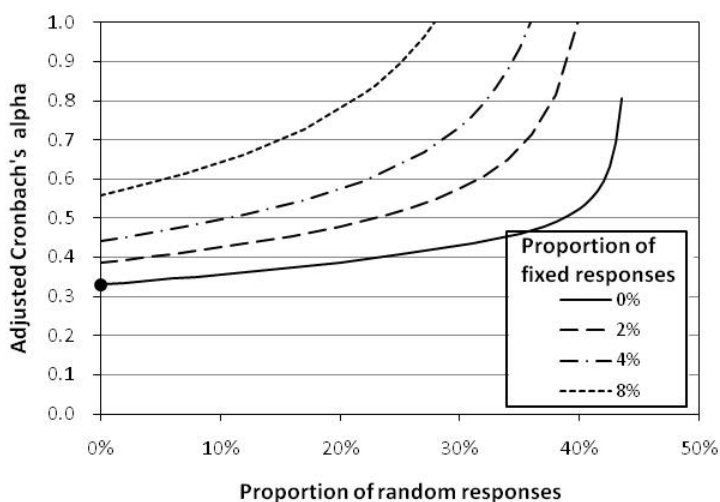

Supplement: MOESM7 [file 9560998]
